# Supplementary material for: Seed- and Soil-Dependent Differences in Murine Breast Tumor Microenvironments Dictate Anti-PD-L1 IgG Delivery and Therapeutic Efficacy
Source: MDPI journal article supplement (doi:10.3390/pharmaceutics13040530), 2021-04-10
Supplement: s1 [file s1]

# Supplementary Materials: Seed- and Soil-Dependent Differences in Murine Breast Tumor Microenvironments Dictate Anti-PD-L1 IgG Delivery and Therapeutic Efficacy

Yan Ting Liu, Shreya Goel, Megumi Kai, Jose Alberto Moran Guerrero, Thao Nguyen, Junhua Mai, Haifa Shen, Arturas Ziemys and Kenji Yokoi

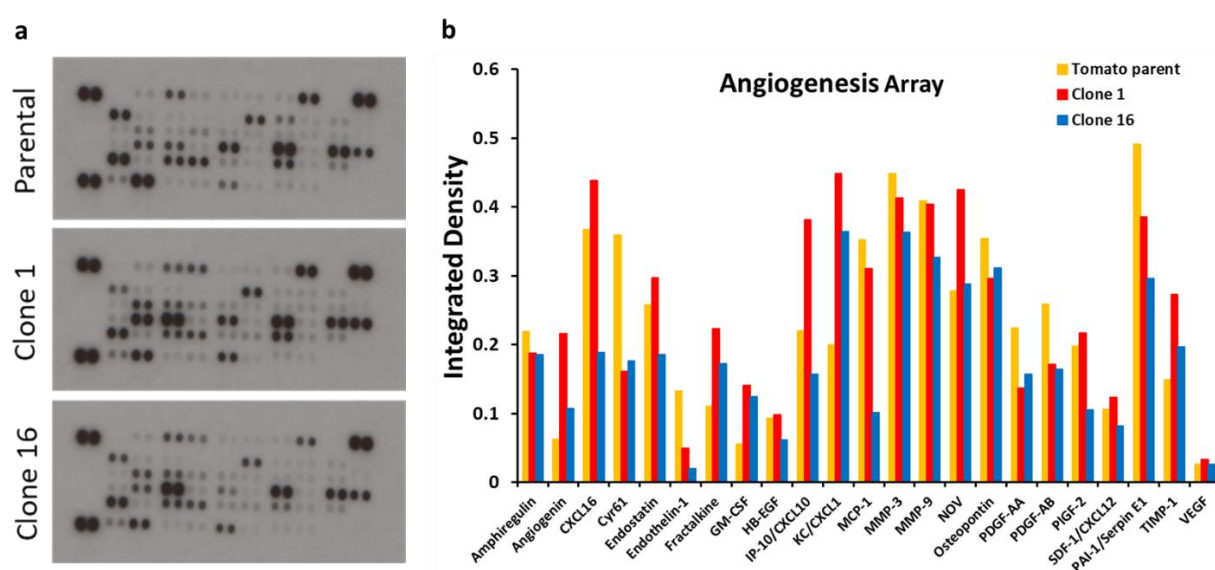

**Figure S1.** In vitro quantification of angiogenesis proteins. Angiogenesis assay was performed to quantify the amount each protein present in parental, Clone 1 and Clone 16 cell culture supernates.

**Publisher's Note:** MDPI stays neutral with regard to jurisdictional claims in published maps and institutional affiliations.

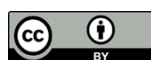

**Copyright:** © 2020 by the authors. Submitted for possible open access publication under the terms and conditions of the Creative Commons Attribution (CC BY) license (<http://creativecommons.org/licenses/by/4.0/>).

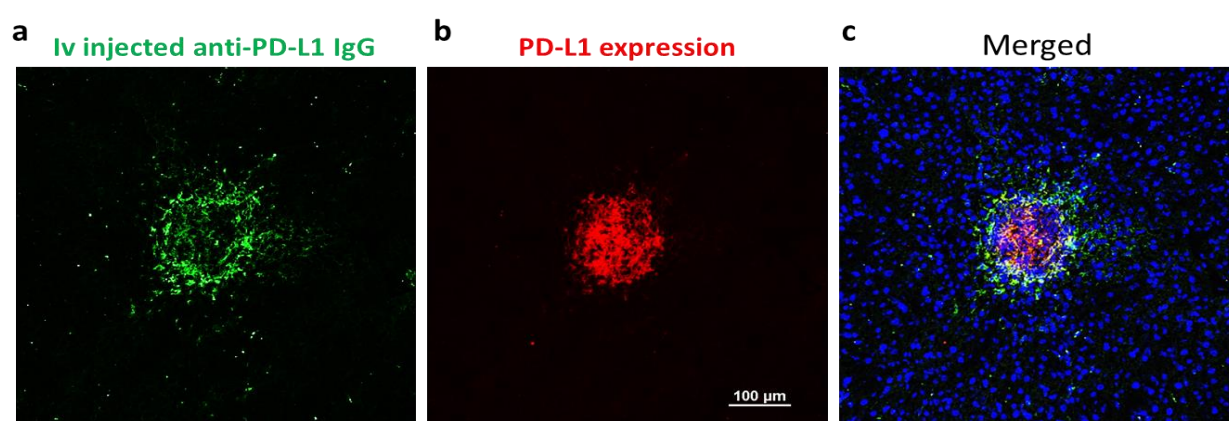

**Figure 2.** Limited distribution of iv injected fluorescently labeled anti-PD-L1 IgG into liver metastasis. Delivery of fluorescently labeled anti-PD-L1 IgG into liver metastasis was limited to the border of liver metastasis (a) although entire tumor expressed PD-L1 (b). Merged image is shown in (c).

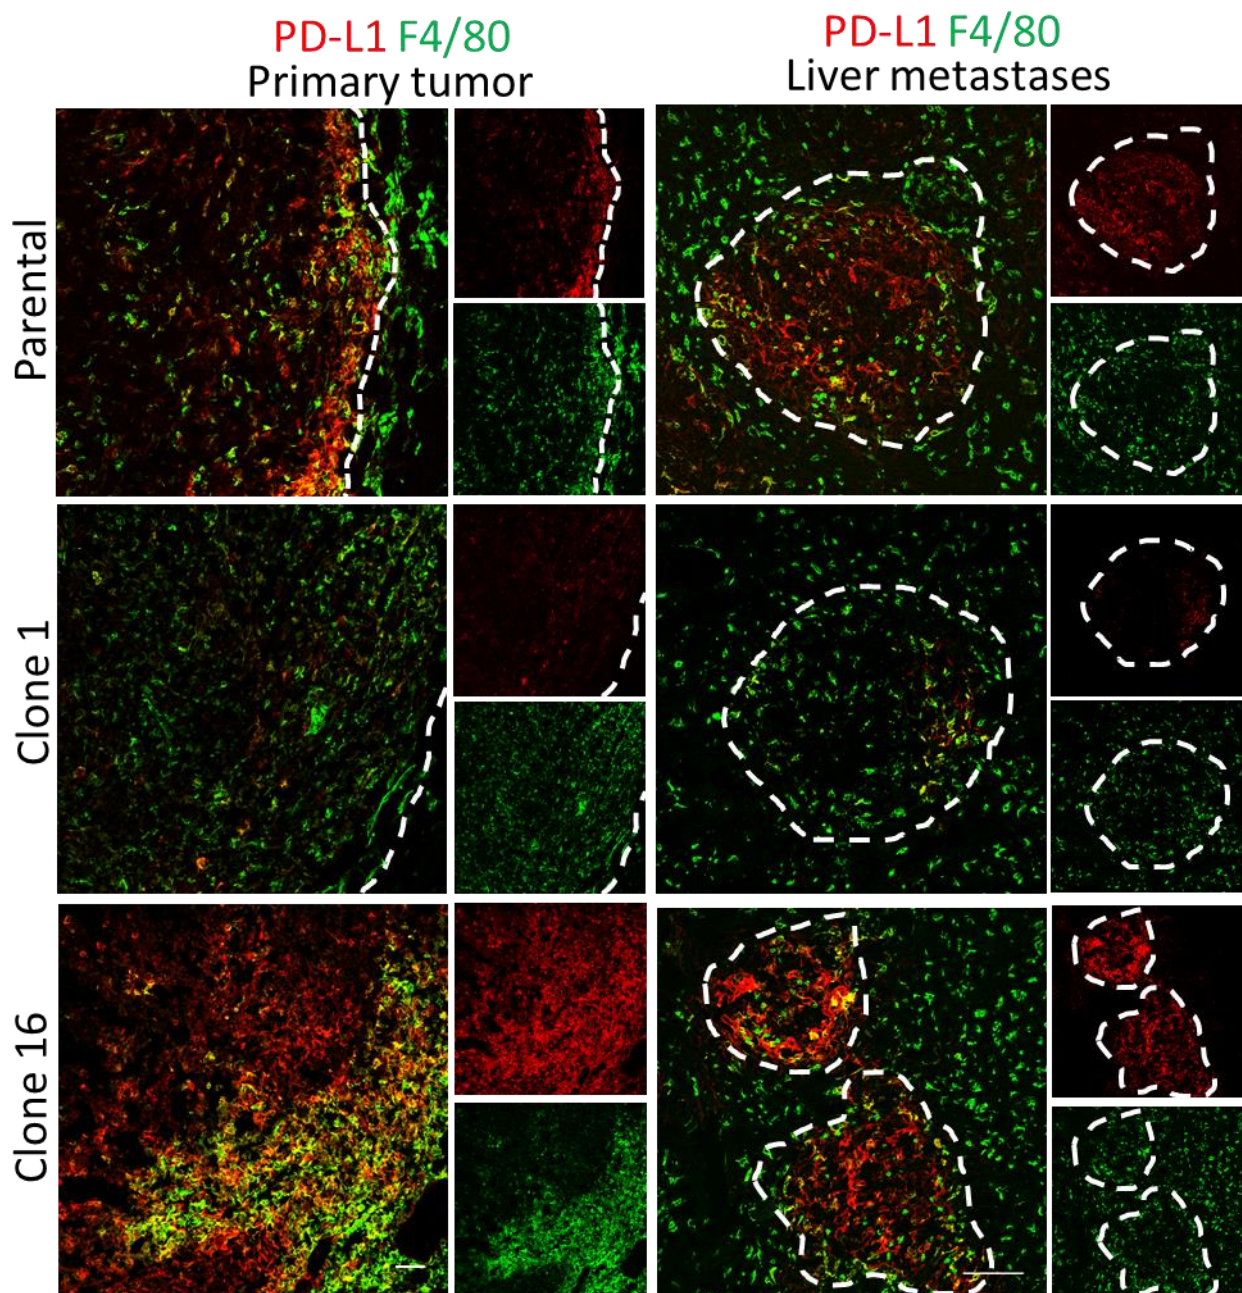

**Figure 3.** Verification of immune maker that express PD-L1 by immunohistochemical imaging of primary tumor and liver metastases. Immunofluorescence imaging of PD-L1 expression (red) and F4/80 (green) in parental-, Clone-1-, Clone-16-derived primary tumors and liver metastases. Scale bar, 100 $\mu$ m.



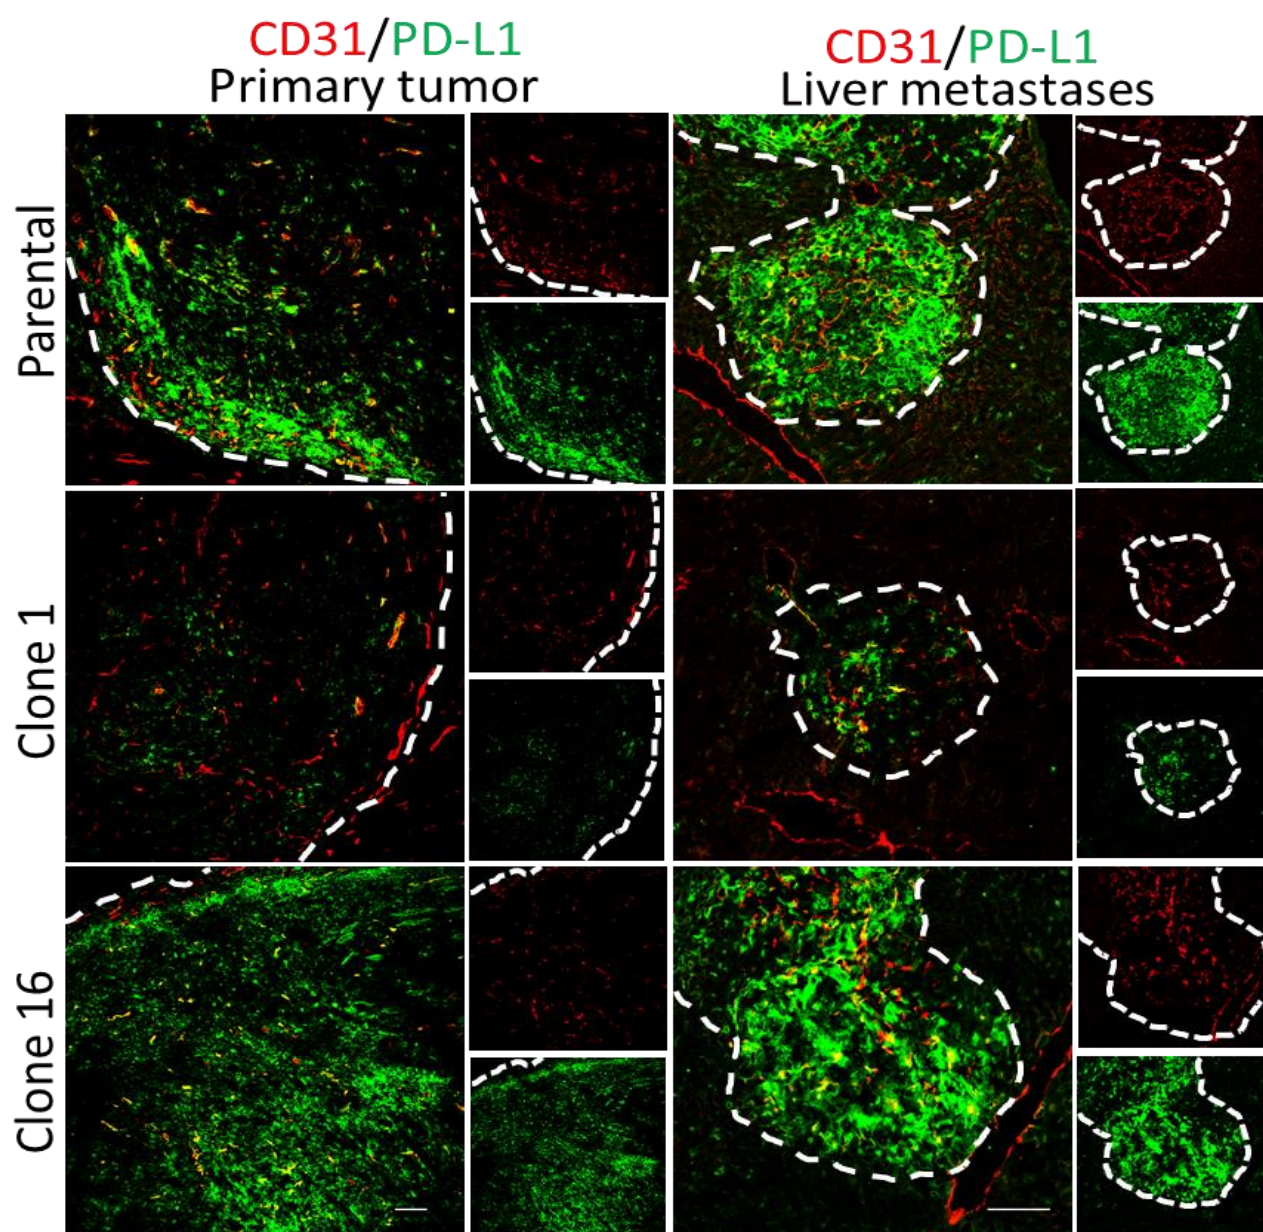

**Figure 4.** Verification of endothelial cells (CD31) that express PD-L1 by immunohistochemical imaging of primary tumor and liver metastases. Immunofluorescence imaging of PD-L1 expression (green) and CD31(red) in parental-, Clone-1-, Clone 16-derived primary tumors and liver metastases. Scale bar, 100 $\mu$ m.
